# Supplementary material for: Physiological and Biochemical Dissection Reveals a Trade-Off between Antioxidant Capacity and Heat Tolerance in Bread Wheat (Triticum aestivum L.)
Source: PubMed Central journal article supplement (PMC7996931; doi:10.3390/antiox10030351), 2021-02-26
Supplement: antioxidants-10-00351-s001.pdf [file antioxidants-10-00351-s001.pdf]

**Table S1.** Cross and pedigree of released wheat varieties in Bangladesh

| Variety     | Pedigree                                                                   | Year of released | Yield (t ha <sup>-1</sup> ) |
|-------------|----------------------------------------------------------------------------|------------------|-----------------------------|
| Pavon 76    | VCM//CNO/7C/3/KAL/BB<br>CM 8399-D-4M-3Y-1M-IY-IM-0Y-0BGD                   | 1979             | 3.70                        |
| BARI Gom 23 | NL297*2/LR25                                                               | 2005             | 4.65                        |
| BARI Gom 25 | ZSH 12/HLB 19//2*NL297                                                     | 2010             | 4.30                        |
| BARI Gom 26 | ICTAL 123/3/RAWAL 87//VEE/HD 2285<br>BD(JO)9585-0JO-3JE-0JE-0JE-HRDI-RC5DI | 2010             | 4.30                        |

**Table S2.** Stress tolerance index (STI) of studied traits.

| Variety | Stress tolerance index (STI) |       |       |         |      |      |      |      |      |                               |
|---------|------------------------------|-------|-------|---------|------|------|------|------|------|-------------------------------|
|         | Chl a                        | Chl b | T Chl | Chl a/b | Car  | Anth | LTD  | MII  | MG   | H <sub>2</sub> O <sub>2</sub> |
| BG 23   | 0.95                         | 0.63  | 0.81  | 1.46    | 0.52 | 0.70 | 0.82 | 1.45 | 2.00 | 1.44                          |
| BG 25   | 0.97                         | 0.95  | 0.97  | 1.00    | 1.18 | 0.95 | 1.52 | 1.16 | 1.32 | 1.16                          |
| BG 26   | 0.77                         | 1.15  | 0.92  | 0.65    | 2.11 | 0.94 | 1.92 | 0.65 | 1.17 | 1.27                          |
| Pavon   | 0.64                         | 0.79  | 0.70  | 0.78    | 0.12 | 0.63 | 0.09 | 1.78 | 2.28 | 2.30                          |

  

| Variety | Stress tolerance index (STI) |      |      |      |      |      |       |        |      |      |
|---------|------------------------------|------|------|------|------|------|-------|--------|------|------|
|         | MDA                          | LOX  | Pro  | GB   | GSH  | AsA  | Gly-I | Gly II | SOD  | CAT  |
| BG 23   | 1.55                         | 1.23 | 1.12 | 2.11 | 1.53 | 0.61 | 0.97  | 1.05   | 1.35 | 0.67 |
| BG 25   | 1.15                         | 1.63 | 1.37 | 3.10 | 1.49 | 0.69 | 1.43  | 1.50   | 1.20 | 0.90 |
| BG 26   | 1.06                         | 1.41 | 1.40 | 2.98 | 2.18 | 0.97 | 1.55  | 1.71   | 1.40 | 1.12 |
| Pavon   | 2.83                         | 1.91 | 1.04 | 0.89 | 1.17 | 0.35 | 0.88  | 0.51   | 0.88 | 0.49 |

  

| Variety | Stress tolerance index (STI) |      |      |      |      |      |       |      |  |
|---------|------------------------------|------|------|------|------|------|-------|------|--|
|         | POD                          | GPX  | GST  | GR   | APX  | DHAR | MDHAR | TDM  |  |
| BG 23   | 0.84                         | 1.64 | 1.25 | 1.64 | 1.32 | 0.83 | 0.78  | 0.70 |  |
| BG 25   | 0.74                         | 1.39 | 1.20 | 1.75 | 1.48 | 0.82 | 0.65  | 1.13 |  |
| BG 26   | 1.16                         | 2.10 | 1.60 | 2.36 | 1.90 | 1.06 | 1.15  | 0.93 |  |
| Pavon   | 0.66                         | 0.94 | 0.81 | 1.45 | 1.07 | 0.71 | 0.57  | 0.66 |  |

**Table S3.** Variance components (%) of morphological, physiological and biochemical traits in the context of wheat varieties × heat stress using the general linear model

| Trait          | Variety (V) | Treatment (T) | V × T  | Residual |
|----------------|-------------|---------------|--------|----------|
| SL             | 34.4***     | 59.9***       | 4.7*   | 1.0***   |
| RL             | 13.9**      | 83.3***       | 1.2    | 1.6***   |
| SDM            | 28.4***     | 64.1***       | 6.4**  | 1.2***   |
| RDM            | 47.7***     | 46.7***       | 5.0**  | 0.7***   |
| TDM            | 33.8***     | 60.0***       | 5.6**  | 0.7***   |
| Chl <i>a</i>   | 20.2***     | 76.9***       | 1.6    | 1.2***   |
| Chl <i>b</i>   | 44.2***     | 52.4***       | 0.8    | 2.5***   |
| T Chl          | 13.8***     | 84.3***       | 1.2    | 0.6***   |
| Chl <i>a/b</i> | 87.8***     | 6.1           | 0.6    | 5.4***   |
| Car            | 82.0***     | 15.9*         | 0.1    | 2.1***   |
| Anth           | 15.8***     | 82.8***       | 1.3*** | 0.1***   |
| LTD            | 93.8***     | 3.1           | 0.1    | 3.0***   |
| MII            | 48.3***     | 45.4***       | 6.0**  | 0.2***   |
| MG             | 9.8***      | 87.8***       | 1.7    | 0.7***   |
| H2O2           | 14.9***     | 78.7***       | 6.4*** | 0.1***   |
| MDA            | 22.8***     | 67.7***       | 9.4*** | 0.1***   |
| LOX            | 6.4***      | 84.1***       | 9.2*** | 0.3***   |
| Gly I          | 39.1***     | 57.2***       | 2.8*   | 0.8***   |
| Gly II         | 72.0***     | 20.7*         | 1.4    | 6.0**    |
| Pro            | 11.4***     | 82.6***       | 5.8*** | 0.3***   |
| GB             | 12.1***     | 82.5***       | 5.1*** | 0.3***   |
| GSH            | 9.8***      | 83.3***       | 6.9**  | 0.1***   |
| AsA            | 12.5***     | 82.1***       | 5.2**  | 0.2***   |
| SOD            | 23.1***     | 70.0***       | 6.5*** | 0.5***   |
| CAT            | 30.6***     | 65.5***       | 2.1    | 1.8***   |
| POD            | 33.5***     | 62.7***       | 1.4    | 2.4***   |
| GPX            | 15.6*       | 76.2**        | 2.1    | 6.1*     |
| GST            | 36.8***     | 61.0***       | 2.1*** | 0.1***   |
| APX            | 10.8*       | 80.8***       | 4.7    | 3.7***   |
| GR             | 4.3***      | 93.6***       | 2.0**  | 0.1***   |
| MDHAR          | 25.1***     | 71.3***       | 2.0    | 1.6***   |
| DHAR           | 18.4***     | 75.3***       | 6.0**  | 0.4***   |

SL- shoot length, RL- root length, SDM- shoot dry matter, RDM- root dry matter, TDM- total dry matter, Chl *a*- chlorophyll *a*, Chl *b*- chlorophyll *b*, T.Chl- total chlorophyll, Chl *a/b*- chlorophyll *a/b*, Car- carotenoids, Anth- anthocyanin, LTD- leaf temperature depression, MII- membrane injury index, MG- methylglyoxal, MDA- malondialdehyde, H<sub>2</sub>O<sub>2</sub>- hydrogen peroxide, LOX- lipoxygenase, Pro- proline, GB- glycine betaine, GSH- glutathione, AsA- ascorbate, Gly I- glyoxalase I, Gly II- glyoxalase II, SOD- superoxide dismutase, CAT- catalase, POD- peroxidase, GPX- Glutathione peroxidase, GST- Glutathione S-transferases, GR- glutathione reductase, APX- ascorbate peroxidase, MDHAR- monodehydroascorbate reductase, and DHAR- dehydroascorbate reductase.

\*\*\*, \*\* and \* indicate significant at P≤0.001, P≤0.01 and P≤0.05, respectively.

**Table S4.** Morphological traits of wheat varieties grown under control and heat stress conditions. SL- shoot length, RL- root length, SDM- shoot dry matter, RDM- root dry matter, TDM- total dry matter

| Variety | Treatment   | SL (cm)                           | RL (cm)                            | SDM (mg)                          | RDM (mg)                         | TDM (mg)                          |
|---------|-------------|-----------------------------------|------------------------------------|-----------------------------------|----------------------------------|-----------------------------------|
| BG23    | Control     | 12.8±0.73 <sup>cd</sup>           | 17.9±0.82 <sup>a-c</sup>           | 16.1±0.55 <sup>a-c</sup>          | 11.2±0.28 <sup>c</sup>           | 27.4±0.81 <sup>b</sup>            |
|         | Heat stress | 10.9±0.62 <sup>d</sup><br>(15.4)  | 14.4±0.65 <sup>d</sup><br>(19.7)   | 13.7±0.59 <sup>c</sup><br>(15.1)  | 8.5±0.33 <sup>d</sup><br>(24.6)  | 22.2±0.91 <sup>c</sup><br>(19.0)  |
| BG25    | Control     | 18.1±0.35 <sup>a</sup>            | 21.1±0.46 <sup>a</sup>             | 18.4±0.55 <sup>a</sup>            | 14.6±0.09 <sup>a</sup>           | 32.9±0.50 <sup>a</sup>            |
|         | Heat stress | 15.8±0.52 <sup>ab</sup><br>(12.8) | 17.9±0.87 <sup>a-c</sup><br>(15.3) | 16.5±0.60 <sup>ab</sup><br>(10.2) | 13.4±0.31 <sup>ab</sup><br>(8.0) | 29.9±0.61 <sup>ab</sup><br>(9.21) |
| BG26    | Control     | 14.7±0.10 <sup>bc</sup>           | 18.4±0.51 <sup>ab</sup>            | 16.1±0.47 <sup>a-c</sup>          | 13.3±0.32 <sup>ab</sup>          | 29.3±0.62 <sup>b</sup>            |
|         | Heat stress | 12.9±0.43 <sup>cd</sup><br>(12.0) | 15.8±0.52 <sup>b-d</sup><br>(14.1) | 14.8±0.49 <sup>bc</sup><br>(7.9)  | 12.8±0.23 <sup>bc</sup><br>(3.8) | 27.6±0.48 <sup>b</sup><br>(6.0)   |
| Pavon   | Control     | 16.3±0.71 <sup>ab</sup>           | 19.5±0.88 <sup>a</sup>             | 15.7±0.41 <sup>bc</sup>           | 12.5±0.58 <sup>bc</sup>          | 28.2±0.96 <sup>b</sup>            |
|         | Heat stress | 11.3±0.29 <sup>d</sup><br>(31.1)  | 14.9±0.58 <sup>cd</sup><br>(23.5)  | 10.6±0.35 <sup>d</sup><br>(32.3)  | 9.6±0.23 <sup>d</sup><br>(23.7)  | 20.2±0.20 <sup>c</sup><br>(28.5)  |

Values represented as mean ±SE. Values in the parentheses indicate percent decrease over normal. Values in a column with different letter(s) are significantly different at P≤0.05.

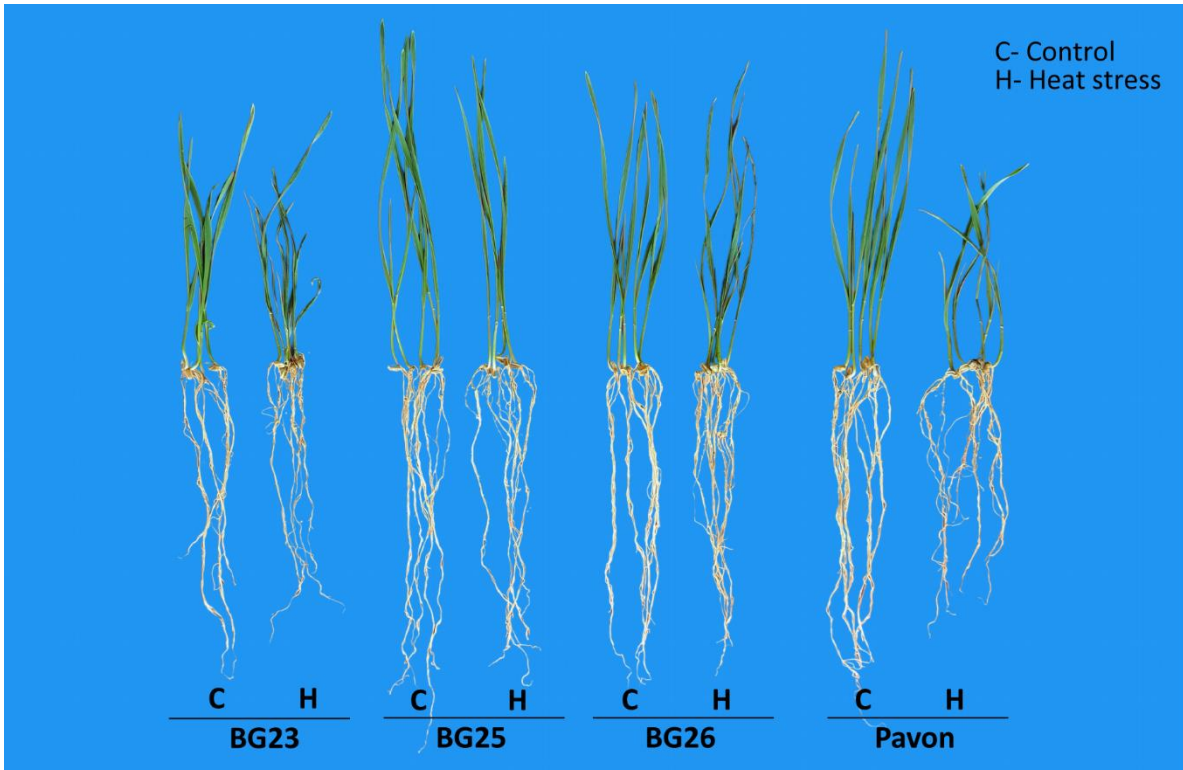

Fig. S1. Comparative changes in shoot and root length of wheat varieties under control and heat stressed conditions.
